# Supplementary material
Source: PubMed Central journal article supplement (PMC2141894)
Supplement: pnas_0706115104_1.pdf [file pnas_0706115104_1.pdf]

Figure S-1: Propagation of the generalized relative variance over time. The dotted, dashed and solid lines represent intra-colony, cross-colony, and overall variance, respectively. The color of the lines (red, orange, green, and blue) corresponds to the initial distributions  $(n_1(0), n_2(0)) = (1, 1), (1, 10), (10, 1)$  and  $(100, 100)$ , respectively. The change of the background color presents the onset of an external signal: pale green means no signals in the culture ( $\tau_{12}^{OFF}$ ) while pale magenta means a signal is released into the culture ( $\tau_{12}^{ON}$ ). Parameters are  $\gamma_1 = 1.0, \gamma_2 = 0.5, \delta_1 = \delta_2 = 0.01, \tau_{12} = 0.01, \tau_{21}^{OFF} = 0.01, \tau_{21}^{ON} = 0.5$ .

Figure S-2: Asymptotic ( $t \rightarrow \infty$ ) relative variance with respect to different initial distributions for a symmetric setup of the rates. Left panel: The cross-colony and total variance coincide as the top surface, the deterministic and intra-colony variance reside the bottom (zero) surface. Right panel: A cross section of the variation indices along the line  $n_1(0) = n_2(0)$ . The parameters are chosen as  $\gamma_1 = \gamma_2 = 1.0$ ,  $\delta_1 = \delta_2 = 0.01$ ,  $\tau_{12} = \tau_{21} = 0.01$ .

Figure S-3: Propagation of the generalized relative variance over time. The lines, from top to bottom, represent the overall variances for the initial numbers  $(n_1(0), n_2(0)) = (0, 1)$ ,  $(n_1(0), n_2(0)) = (1, 0)$ ,  $(n_1(0), n_2(0)) = (1, 1)$ ,  $(1, 10)$ ,  $(10, 1)$  and  $(100, 100)$ , respectively.

Figure S-4: Relative variances of cellular populations in a logistic environment. **(a)** and **(b)** Typical trajectories of cell populations of the two phenotypes obtained from Gillespie simulations. In **(a)** the initial state is  $n_1(0) = 1, n_2(0) = 0$  and in **(b)** it is  $n_1(0) = 0, n_2(0) = 1$ . The different colors of the curves represent trajectories from different runs. **(c)** The relative variances for the initial numbers  $n_1(0) = 1, n_2(0) = 0$  which corresponds to **(a)**. After the transients decay, the cross-colony variance goes to the steady state, zeros, in this case. **(d)** The relative variances for the initial numbers  $n_1(0) = 0, n_2(0) = 1$  which corresponds to **(b)**. After the transients decay, the cross-colony variance goes to the steady state, zeros, in this case.
