# Supplementary material
Source: PubMed Central journal article supplement (PMC2141894)

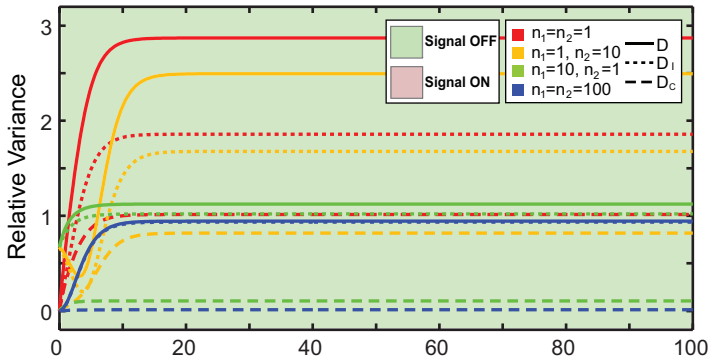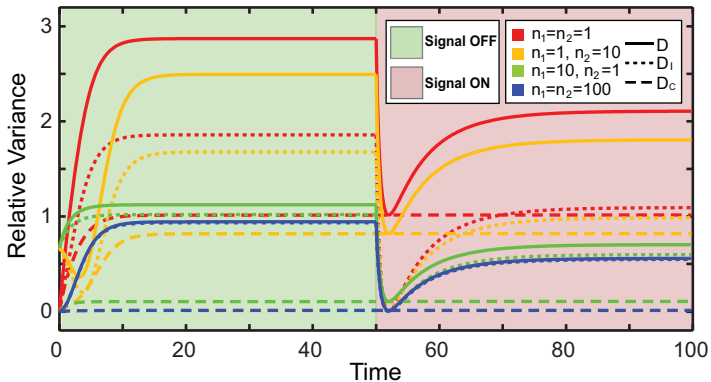

Supplement: pnas_0706115104_2.pdf [file pnas_0706115104_2.pdf]

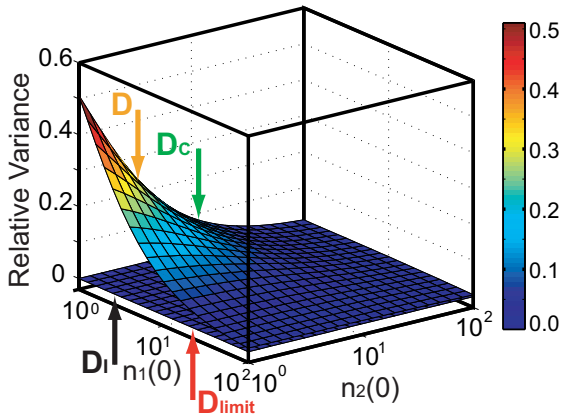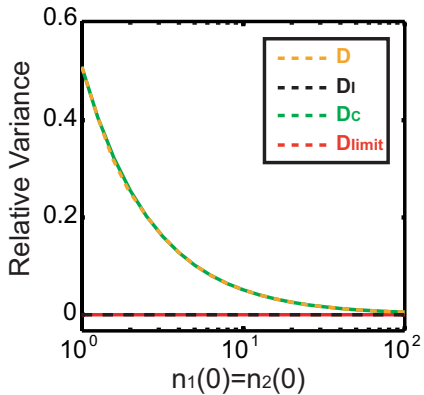

Supplement: pnas_0706115104_3.pdf [file pnas_0706115104_3.pdf]

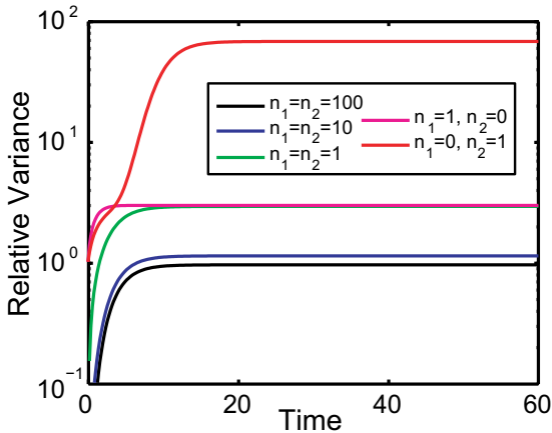

Supplement: pnas_0706115104_4.pdf [file pnas_0706115104_4.pdf]

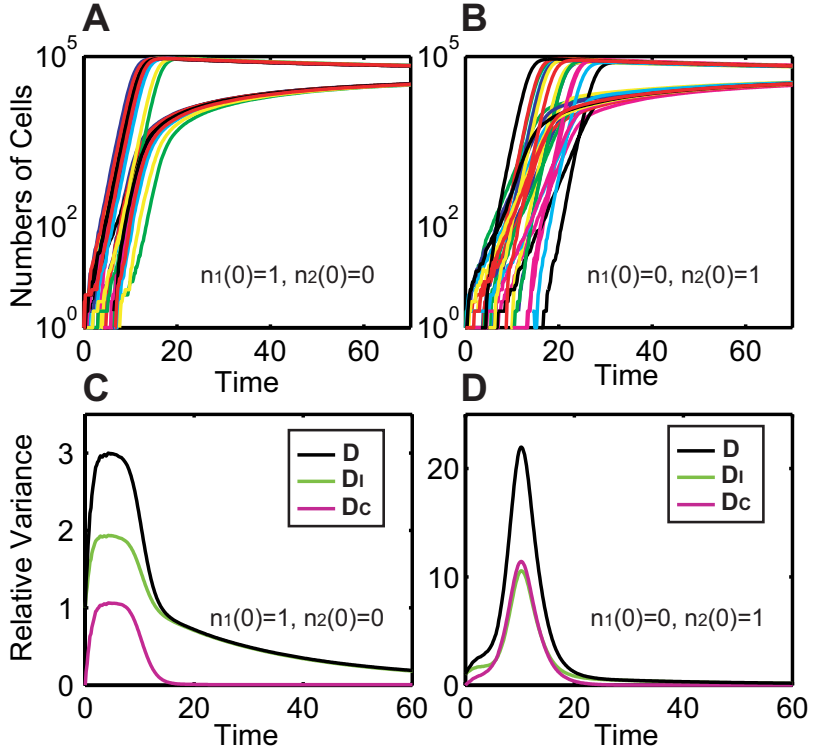

Supplement: pnas_0706115104_5.pdf [file pnas_0706115104_5.pdf]
